# Supplementary material for: Mo-modified electronic effect on sub-2 nm Ru catalyst for enhancing hydrogen oxidation catalysis
Source: Royal Society of Chemistry journal article supplement (doi:10.1039/d3ta00287j), 2023-01-01
Supplement: d3ta00287j1.pdf [file d3ta00287j1.pdf]

## Electronic Supplementary Information

### Mo-modified electronic effect on Sub-2 nm Ru catalyst for enhancing the hydrogen oxidation catalysis

Min Ma,<sup>a,b</sup> Chaofan Chen,<sup>a</sup> Xibo Zhang,<sup>a</sup> Hongsheng Zhao,<sup>a</sup> Qiuxiang Wang,<sup>c</sup> Guifen Du,<sup>c</sup> Zhaoxiong Xie,<sup>a</sup> and Qin Kuang<sup>a\*</sup>

<sup>a</sup>State Key Laboratory of Physical Chemistry of Solid Surfaces & Department of Chemistry, College of Chemistry and Chemical Engineering, Xiamen University, Xiamen 361005, Fujian (P. R. China). E-mail: qkuang@xmu.edu.cn; Fax: (+) 86-592-2183047.

<sup>b</sup>School of Materials Science and Engineering, Shandong University of Science and Technology, Qingdao 266590, Shandong (P. R. China).

<sup>c</sup>Instrumental Analysis Center, Huaqiao University, Xiamen 361021, Fujian (P. R. China).

#### 1. Experimental Section

**Materials:** Zinc nitrate hexahydrate ( $\text{Zn}(\text{NO}_3)_2 \cdot 6\text{H}_2\text{O}$ , 99%), potassium hydroxide (KOH,  $\geq 85\%$ ), sulfuric acid ( $\text{H}_2\text{SO}_4$ , 95~98%), methanol ( $\text{CH}_3\text{OH}$ ,  $\geq 99.5\%$ ), ethanol ( $\text{C}_2\text{H}_5\text{OH}$ ,  $\geq 99.7\%$ ) were purchased from Sinopharm Chemical Reagent Co. Ltd. (Shanghai, China). Phosphomolybdic acid (PMA,  $\text{H}_3[\text{P}(\text{Mo}_3\text{O}_{10})_4] \cdot x\text{H}_2\text{O}$ ) was purchased from Tianjin Guangfu Fine Chemical Research Institute, and  $\text{RuCl}_3 \cdot x\text{H}_2\text{O}$  was provided by Aladdin Reagent (Shanghai) Co., Ltd. Ru/C (5 wt%) was provided by Alfa Aesar (China) Chemicals Co., Ltd. while 2-methylimidazole (HmIM, 99%) was supplied by J.K. Ultra-high purity  $\text{H}_2$  (UHP,  $>99.999\%$ ) and ultra-high purity Ar (UHP,  $>99.999\%$ ) were purchased from Linde Industrial Gases.

**Preparation of Ru/C working electrodes:** Firstly, 2 mg of Ru/C were dispersed in the mixed solution containing of 350  $\mu\text{L}$   $\text{C}_3\text{H}_8\text{O}$ , 140  $\mu\text{L}$   $\text{H}_2\text{O}$  and 10  $\mu\text{L}$  Nafion. To obtain a homogeneous ink, the forcefully ultrasonicated process was performed on this aforesaid solution for at least 2 h. This calculated ink was then carefully coated onto the clean glassy carbon electrode (GC). It should be noted that GC electrode was set at the rotating speed of 800 rpm to prepare the uniform catalyst film having a Ru loading of  $15.0 \mu\text{g cm}^{-2}$ . The preparation for other working electrodes, such as Sub-2 nm RuMo/HC (Ru loading of  $13.3 \mu\text{g cm}^{-2}$ ), Sub-2 nm Ru/HC (Ru loading of  $14.7 \mu\text{g cm}^{-2}$ ) and Pt/C, also followed this above process.

**Characterizations:** X-ray diffraction (XRD) patterns of our samples were operated on a Rigaku Ultima IV diffractometer with Cu K $\alpha$  radiation (40 KV, 30 mA). Scanning electron microscope (SEM) images were collected on a Hitachi S4800 device at an accelerated voltage (15 kV), while X-ray photoelectron spectroscopy (XPS) and its valence band spectra were measured on an ESCALab 250 X-ray photoelectron spectrometer. Transmission electron microscope (TEM), high angle annular dark-field scanning TEM (HAADF-STEM), and energy dispersive X-ray (EDX) elemental mapping images were recorded on an FEI TECNAI F30 microscope with an accelerating voltage of 300 KV. The quantitative analysis of metal elements in samples were achieved by inductively coupled plasma optical emission spectrometry (ICP-OES). And before the ICP-OES test, sample powder needed to be digested in aqua regia ( $\text{HCl}/\text{HNO}_3 = 3:1$ ) for at least 6 times.

**Electrochemical measurement:** Electrochemical tests were performed on rotating ring disk electrode (RRDE-3A, ALS) and CHI 650E electrochemical workstation (CH Instruments, Inc., Shanghai) in 0.1 M KOH under ambient conditions. A typical three-electrode system was utilized to estimate the alkaline HOR performance on as-studied catalysts, where Sub-2 nm RuMo/HC (or other control samples) was used as the working electrode, carbon rod as the counter electrode, and saturated calomel electrode (SCE) as the

reference electrode. Before HOR test, cyclic voltammetry (CV) for over 20 cycles were performed to clean and activate the electrode's surface. Then, the HOR activities were measured by linear sweep voltammetry (LSV) with a positive scan rate of  $10 \text{ mV s}^{-1}$  in  $\text{H}_2$ -saturated  $0.1 \text{ M KOH}$  (rotating speed: 1600 rpm). Especially, electrical resistance ( $iR$ ) compensation for all catalysts was corrected automatically during HOR testing on electrochemical workstation.

**Calculation of d band center:** To reveal the effect of Mo element on the electronic structure of Ru surface, XPS valence band spectra of three samples were measured and analyzed. As previously reported, the position of d band center ( $\epsilon_d$ ) from XPS valence band spectra could be obtained from the next formula:

$$\epsilon_d = \frac{\int \rho E dE}{\int \rho dE}$$

Where  $\rho$  and  $E$  are the density of states and energy of electron, respectively. It should be noted that the intensity in XPS valence-band spectra is proportional to the density of states.

## 2. Supplementary Results

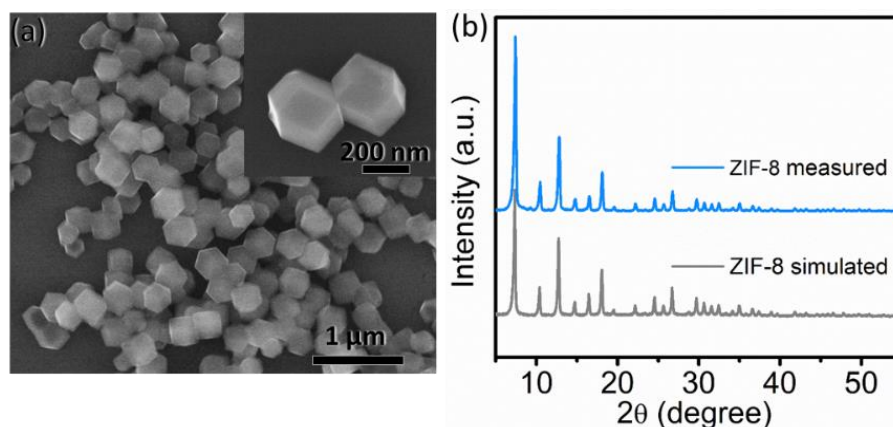

**Fig. S1** (a) SEM images and (b) measured and simulated XRD patterns of ZIF-8 sample.

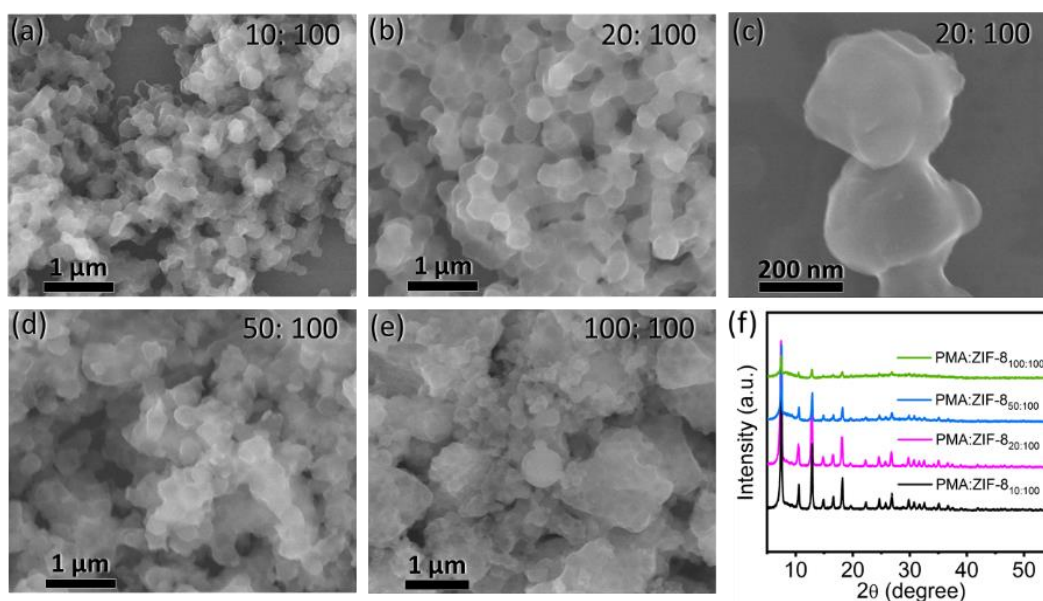

**Fig. S2** (a-e) SEM images and (f) XRD patterns of ZIF-8@Mo precursors with different mass ratios of ZIF-8/PMA raw material.

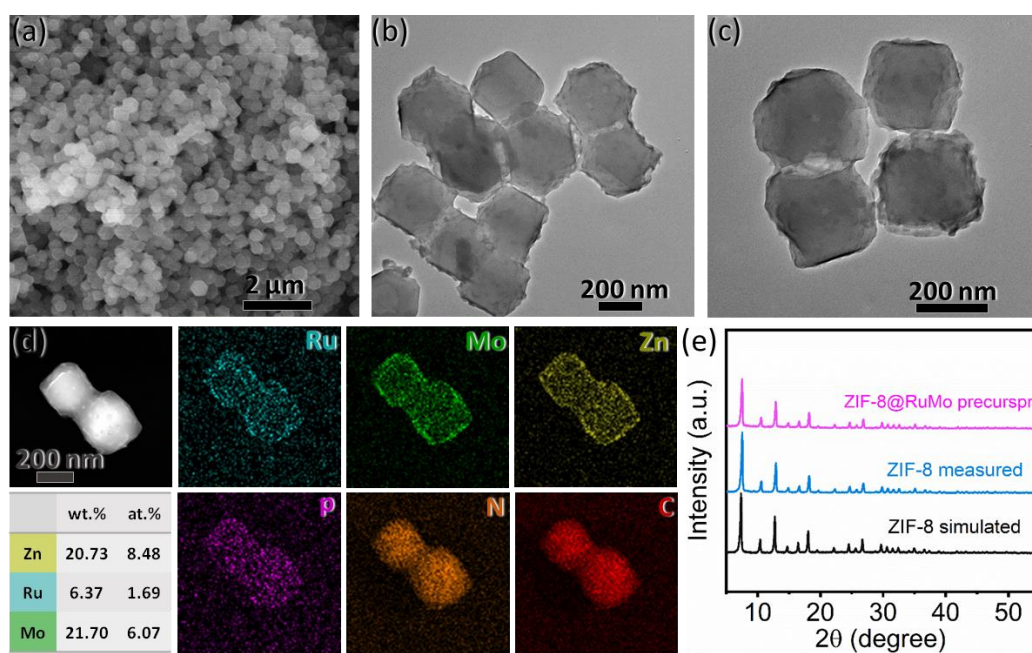

**Fig. S3** (a) SEM and (b-c) TEM images of ZIF-8@RuMo precursor. (d) HAADF-STEM image and corresponding element mapping images of ZIF-8@RuMo precursor. (e) XRD patterns of ZIF-8@RuMo precursor and ZIF-8 (measured/simulated).

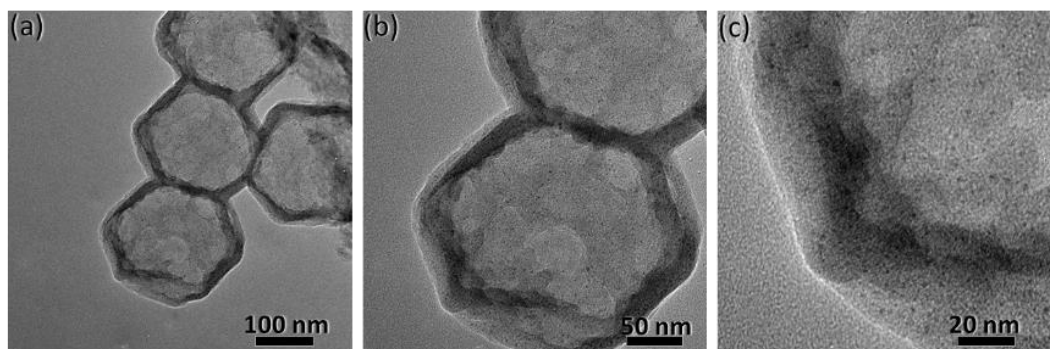

**Fig. S4** TEM and HR-TEM images of Sub-nm Ru/NHC at different magnifications.

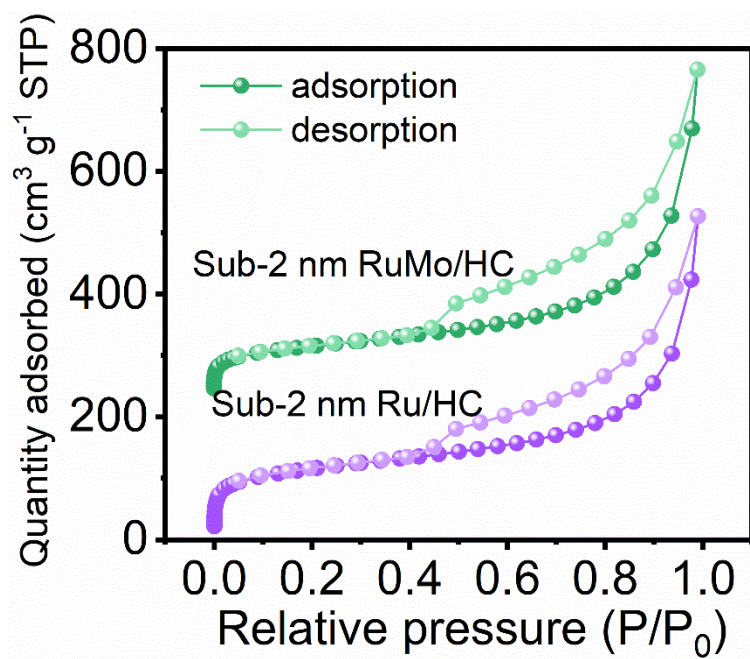

**Fig. S5** N<sub>2</sub> adsorption-desorption isotherms of Sub-2 nm RuMo/HC and Sub-2 nm Ru/HC.

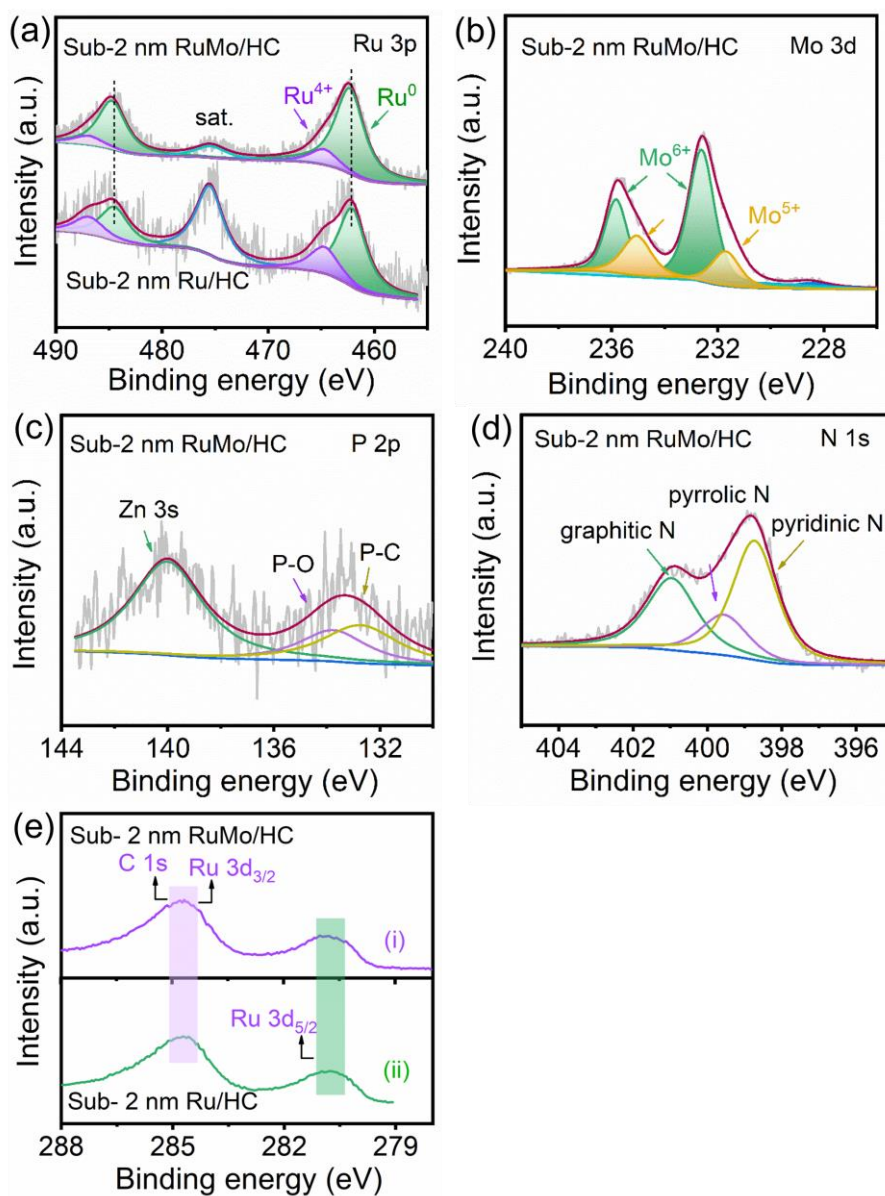

**Fig. S6** XPS spectra in the (a) Ru 3p, (b) Mo 3d, (c) P 2p, (d) N 1s and (e) C 1s or Ru 3d regions from Sub-2 nm RuMo/HC or Sub-2 nm Ru/HC catalysts.

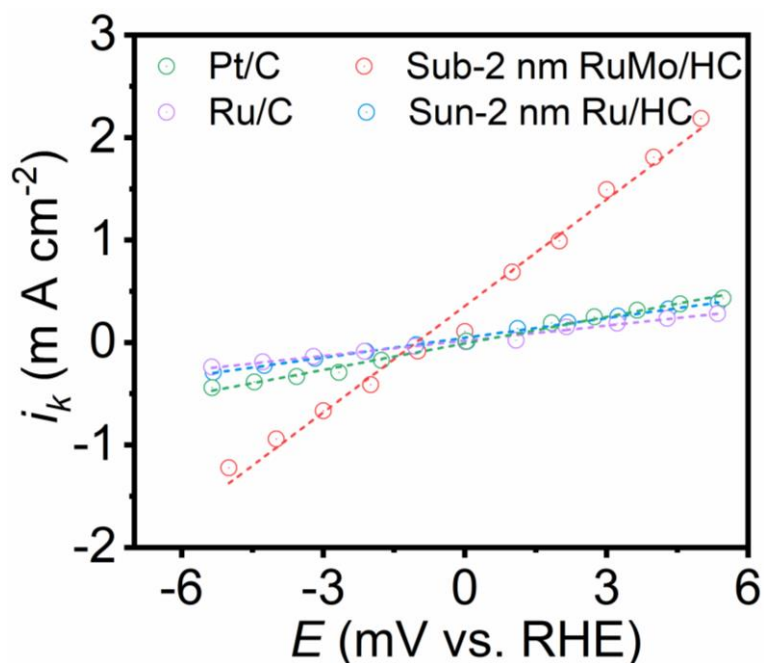

**Fig. S7** Micro-polarization region curves for Sub-2 nm RuMo/HC, Sub-2 nm Ru/HC, commercial Ru/C and Pt/C catalysts. The dotted lines represent the fitting ones.

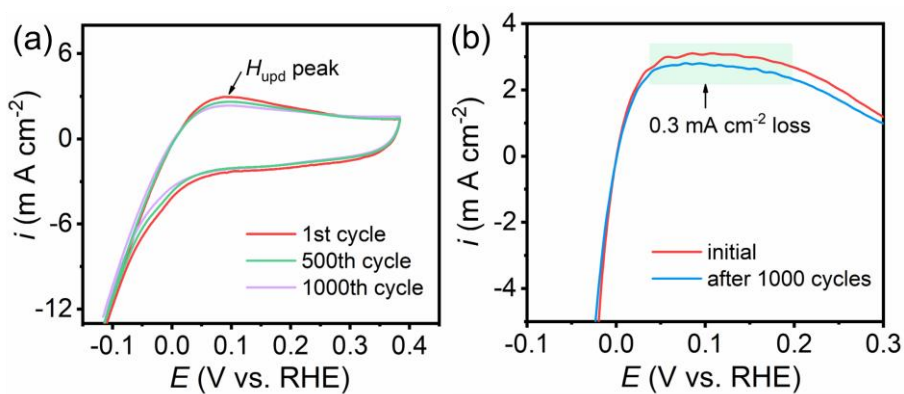

**Fig. S8** (a) CV curves of Sub-2 nm RuMo/HC at different cycles with a scan rate of 50 mV s<sup>-1</sup>, and (b) comparison of the LSV curves for Sub-2 nm RuMo/HC before and after 1000 cycles tested in H<sub>2</sub>-saturated 0.1 M KOH.

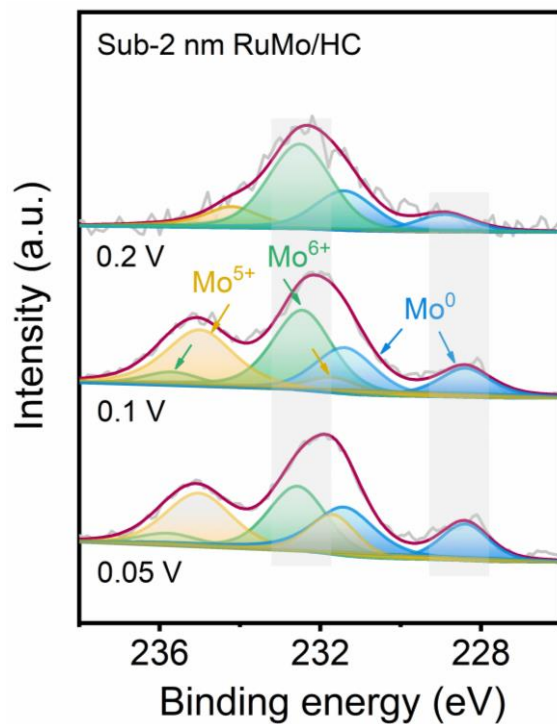

**Fig. S9** XPS spectra in the Mo 3d region from Sub-2 nm RuMo/HC after stability test under different applied potentials from 0.05 to 0.20 V vs. RHE.

**Table S1** EDX data of Sub-2 nm RuMo/HC and Sub-2 nm Ru/HC samples.

| Element   | Sub-2 nm RuMo/HC (wt.%) | Sub-2 nm Ru/HC (wt.%) |
|-----------|-------------------------|-----------------------|
| <b>Ru</b> | 20.93                   | 16.01                 |
| <b>Mo</b> | 32.75                   | ~~                    |
| <b>C</b>  | 38.49                   | 74.28                 |
| <b>N</b>  | 2.06                    | 3.53                  |
| <b>P</b>  | 1.03                    | ~~                    |
| <b>O</b>  | 4.74                    | 6.18                  |



**Table S2** ICP data of Sub-2 nm RuMo/HC and Sub-2 nm Ru/HC samples.

| Sample           | Data 1<br>(wt.%) | Data 2<br>(wt.%) | Data 3<br>(wt.%) | Average<br>(wt.%) |
|------------------|------------------|------------------|------------------|-------------------|
| Sub-2 nm RuMo/HC | 18.59<br>(Ru)    | 18.54<br>(Ru)    | 18.63<br>(Ru)    | 18.59<br>(Ru)     |
| Sub-2 nm RuMo/HC | 28.78<br>(Mo)    | 28.71<br>(Mo)    | 28.64<br>(Mo)    | 28.71<br>(Mo)     |
| Sub-2 nm Ru/HC   | 15.75<br>(Ru)    | 15.70<br>(Ru)    | 15.58<br>(Ru)    | 15.67<br>(Ru)     |

**Table S3** Comparison for exchange current density ( $j_0$ ) and transfer coefficient ( $\alpha$ ) of Sub-2 nm RuMo/HC, Sub-2 nm Ru/HC, commercial Pt/C and Ru/C samples.

| Catalyst         | $j_0$ (mA cm <sup>-2</sup> ) <sup>a</sup> | Transfer coefficients ( $\alpha$ ) | $j_0$ (mA cm <sup>-2</sup> ) <sup>b</sup> |
|------------------|-------------------------------------------|------------------------------------|-------------------------------------------|
| Sub-2 nm RuMo/HC | 10.3                                      | 0.76                               | 8.91                                      |
| Sub-2 nm Ru/HC   | 1.71                                      | 0.54                               | 1.65                                      |
| Pt/C             | 1.90                                      | 0.56                               | 2.22                                      |
| Ru/C             | 1.16                                      | 0.45                               | 1.27                                      |

$j_0$  (mA cm<sup>-2</sup>)<sup>a</sup>: The  $j_0$  value is calculated by non-linear fitting of the Tafel plot with Butler–Volmer equation;

$j_0$  (mA cm<sup>-2</sup>)<sup>b</sup>: The  $j_0$  value is determined by linear fitting of the micro-polarized region.

**Table S4** Comparisons of HOR performance for as-prepared Sub-2 nm RuMo/HC and Sub-2 nm Ru/HC with other Ru-based catalysts operated in alkaline electrolyte.

| Catalyst                                 | $\eta$ mV@MA                                | loading                                         | Ref.                                                   |
|------------------------------------------|---------------------------------------------|-------------------------------------------------|--------------------------------------------------------|
| Sub-2 nm RuMo/HC                         | 50@3.83 A mg <sup>-1</sup> <sub>PGM</sub>   | 13.3 $\mu\text{g}_{\text{PGM}} \text{cm}^{-2}$  | This work                                              |
|                                          | 20@0.81 A mg <sup>-1</sup> <sub>PGM</sub>   |                                                 |                                                        |
| Sub-2 nm Ru/HC                           | 50@0.30 A mg <sup>-1</sup> <sub>PGM</sub>   | 14.7 $\mu\text{g}_{\text{PGM}} \text{cm}^{-2}$  | This work                                              |
| Ru@TiO <sub>2</sub>                      | 20@<0.3 A mg <sup>-1</sup> <sub>PGM</sub>   | 25 $\mu\text{g}_{\text{PGM}} \text{cm}^{-2}$    | <i>Nat. Catal.</i> 2020, <b>3</b> , 454–462.           |
| Ru <sub>7</sub> Ni <sub>3</sub> /C       | 50@9.4 A mg <sup>-1</sup> <sub>PGM</sub>    | 3.9 $\mu\text{g}_{\text{PGM}} \text{cm}^{-2}$   | <i>Nat. Commun.</i> 2020, <b>11</b> , 565.             |
| RuNi1                                    | 50@2.7 A mg <sup>-1</sup> <sub>PGM</sub>    | ~8 $\mu\text{g}_{\text{PGM}} \text{cm}^{-2}$    | <i>Nano Lett.</i> 2020, <b>20</b> , 3442–3448.         |
| Ru <sub>0.95</sub> Co <sub>0.05</sub> /C | 10@0.16 A mg <sup>-1</sup> <sub>PGM</sub>   | ~13 $\mu\text{g}_{\text{PGM}} \text{cm}^{-2}$   | <i>ACS Catal.</i> 2020, <b>10</b> , 4608–4616.         |
| P–Ru/C                                   | ~~                                          | ~6 $\mu\text{g}_{\text{PGM}} \text{cm}^{-2}$    | <i>ACS Catal.</i> 2020, <b>10</b> , 11751–11757.       |
| Ru nanoassembly                          | 50@0.041 A mg <sup>-1</sup> <sub>PGM</sub>  | 180 $\mu\text{g}_{\text{PGM}} \text{cm}^{-2}$   | <i>Appl. Catal. B</i> 2019, <b>258</b> , 117952.       |
| Ru/PEI-XC                                | 50@0.423 A mg <sup>-1</sup> <sub>PGM</sub>  | ~21.6 $\mu\text{g}_{\text{PGM}} \text{cm}^{-2}$ | <i>J. Mater. Chem. A</i> 2021, <b>9</b> , 22934–22942. |
| RuRh-Co                                  | 50@0.0117 A mg <sup>-1</sup> <sub>PGM</sub> | 250 $\mu\text{g}_{\text{metal}} \text{cm}^{-2}$ | <i>Nano Energy</i> 2021, <b>90</b> , 106579.           |
| IO-Ru–TiO <sub>2</sub> /C                | 50@0.907 A mg <sup>-1</sup> <sub>PGM</sub>  | 25.48 $\mu\text{g}_{\text{PGM}} \text{cm}^{-2}$ | <i>J. Mater. Chem. A</i> 2020, <b>8</b> , 10168–10174. |

**Table S5** Percentage content of RuO<sub>x</sub> (Ru<sup>4+</sup>) on two samples' surface after electrolysis test at different overpotential. These data were calculated from Ru 3p XPS spectra.

| <b>Catalyst</b>         | <b>0.05 V vs. RHE</b>  | <b>0.1 V vs. RHE</b>   | <b>0.2 V vs. RHE</b>   |
|-------------------------|------------------------|------------------------|------------------------|
| <b>Sub-2 nm RuMo/HC</b> | 9.9% RuO <sub>x</sub>  | 11.7% RuO <sub>x</sub> | 12.6% RuO <sub>x</sub> |
| <b>Sub-2 nm Ru/HC</b>   | 23.5% RuO <sub>x</sub> | 27.3% RuO <sub>x</sub> | 40.9% RuO <sub>x</sub> |
